# Supplementary material for: Atmospheric stability of arsines and the determination of their oxidative products in atmospheric aerosols (PM10): evidence of the widespread phenomena of biovolatilization of arsenic
Source: Royal Society of Chemistry journal article supplement (doi:10.1039/b915867g), 2009-11-17
Supplement: supplementarydata.pdf [file supplementarydata.pdf]

Supplementary data: Atmospheric stability of arsines and the determination of their  
oxidative products in atmospheric aerosols (PM10)

By R. Jakob et al. JEM 2009

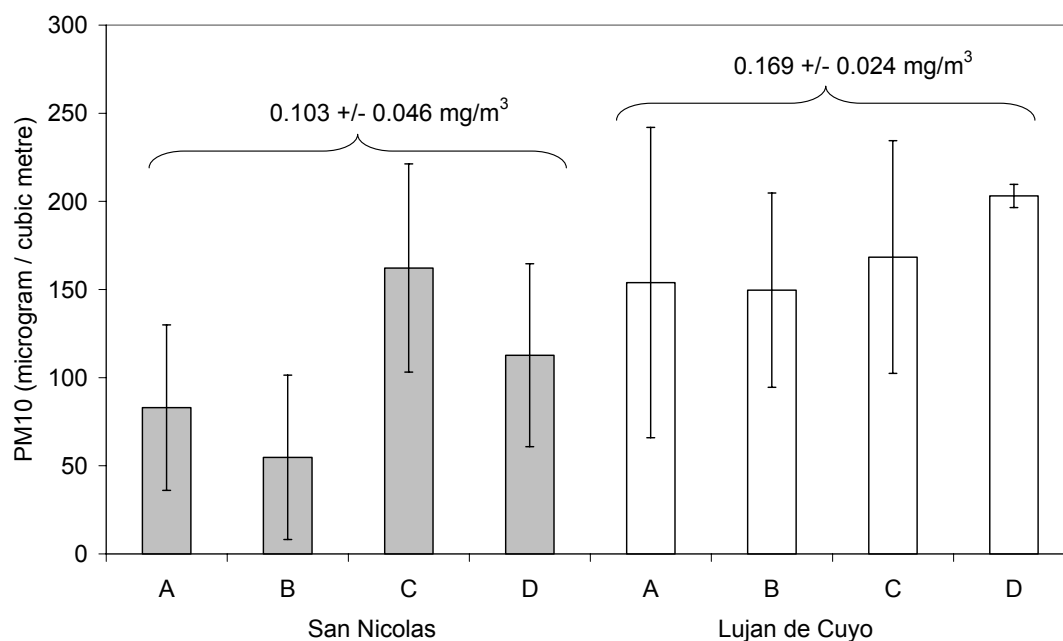

**Figure S1:** amount of PM<sub>10</sub> collected at four different sampling points at each location. The error bars represent the variability at N=6-7 samples except N = 3 for D (Lujan).
